# Supplementary material
Source: publisher site journal article supplement (https://www.dovepress.com/article/439775)
Supplement: Supplementary file 1 [file get_supplementary_file.php]

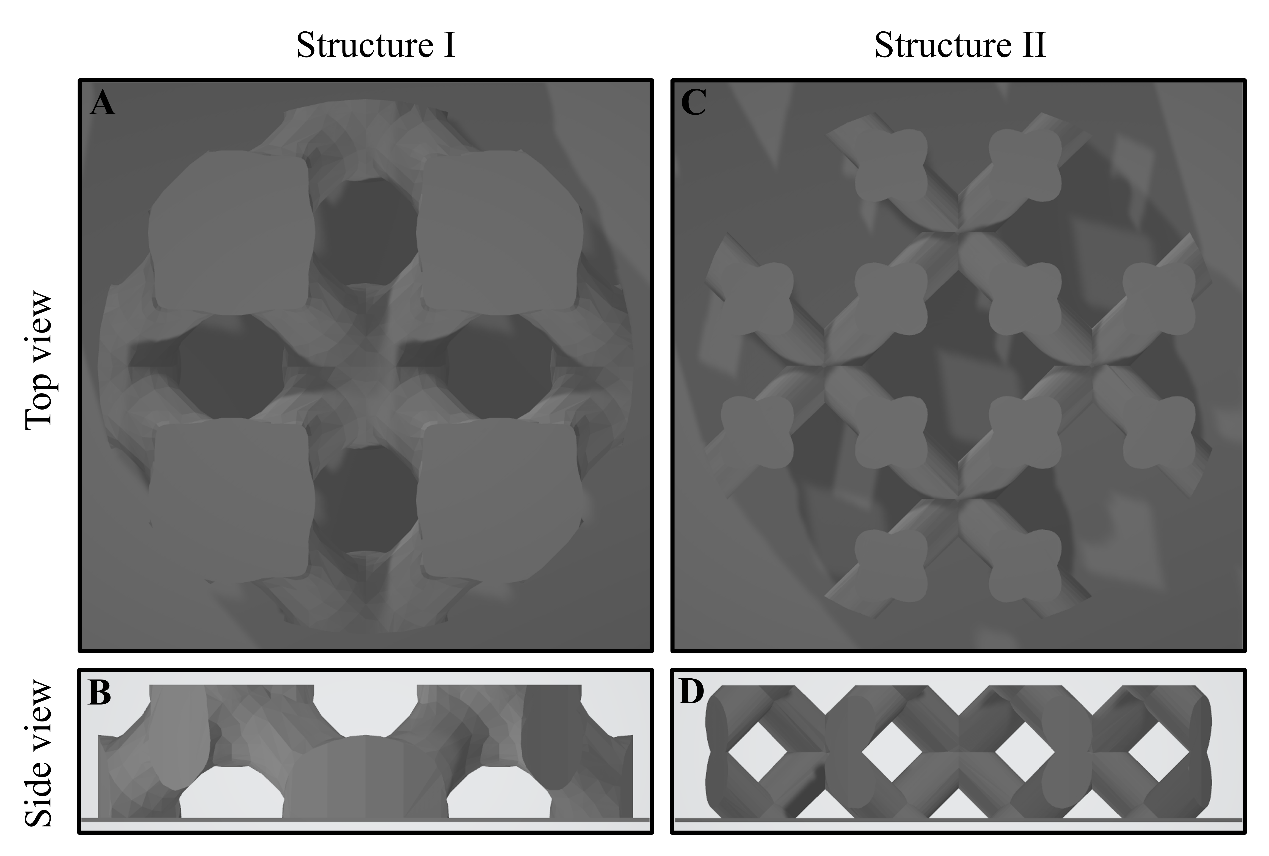


Figure S1. 3D printed design drawings of structure I and structure II. (A) Top view of structure I model. (B) Side view of structure I model. (C) Top view of structure II model. (D) Side view of structure II model.
